# Supplementary material for: Isotopic exchange on the diurnal scale between near-surface snow and lower atmospheric water vapor at Kohnen station, East Antarctica
Source: Copernicus journal article supplement (doi:10.5194/tc-10-1647-2016), 2016-07-29
Supplement: Supplementary file 4 [file tc-10-1647-2016-supplement.zip]

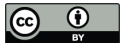

## *Supplement of*

# **Isotopic exchange on the diurnal scale between near-surface snow and lower atmospheric water vapor at Kohnen station, East Antarctica**

**François Ritter et al.**

*Correspondence to:* François Ritter (fritte2@uic.edu)

- tc-10-1647-2016-supplement-title-page.pdf
- supplementary\_material
  - FigS1.pdf
  - FigS2.pdf
  - FigS3.pdf
  - data\_kohnen.xlsx
  - supp\_kohnen\_paper.pdf
  - supp\_kohnen\_paper.tex

The copyright of individual parts of the supplement might differ from the CC-BY 3.0 licence.
