# Supplementary figures and images for: Isotopic exchange on the diurnal scale between near-surface snow and lower atmospheric water vapor at Kohnen station, East Antarctica
Source: Copernicus journal article supplement (doi:10.5194/tc-10-1647-2016), 2016-07-29

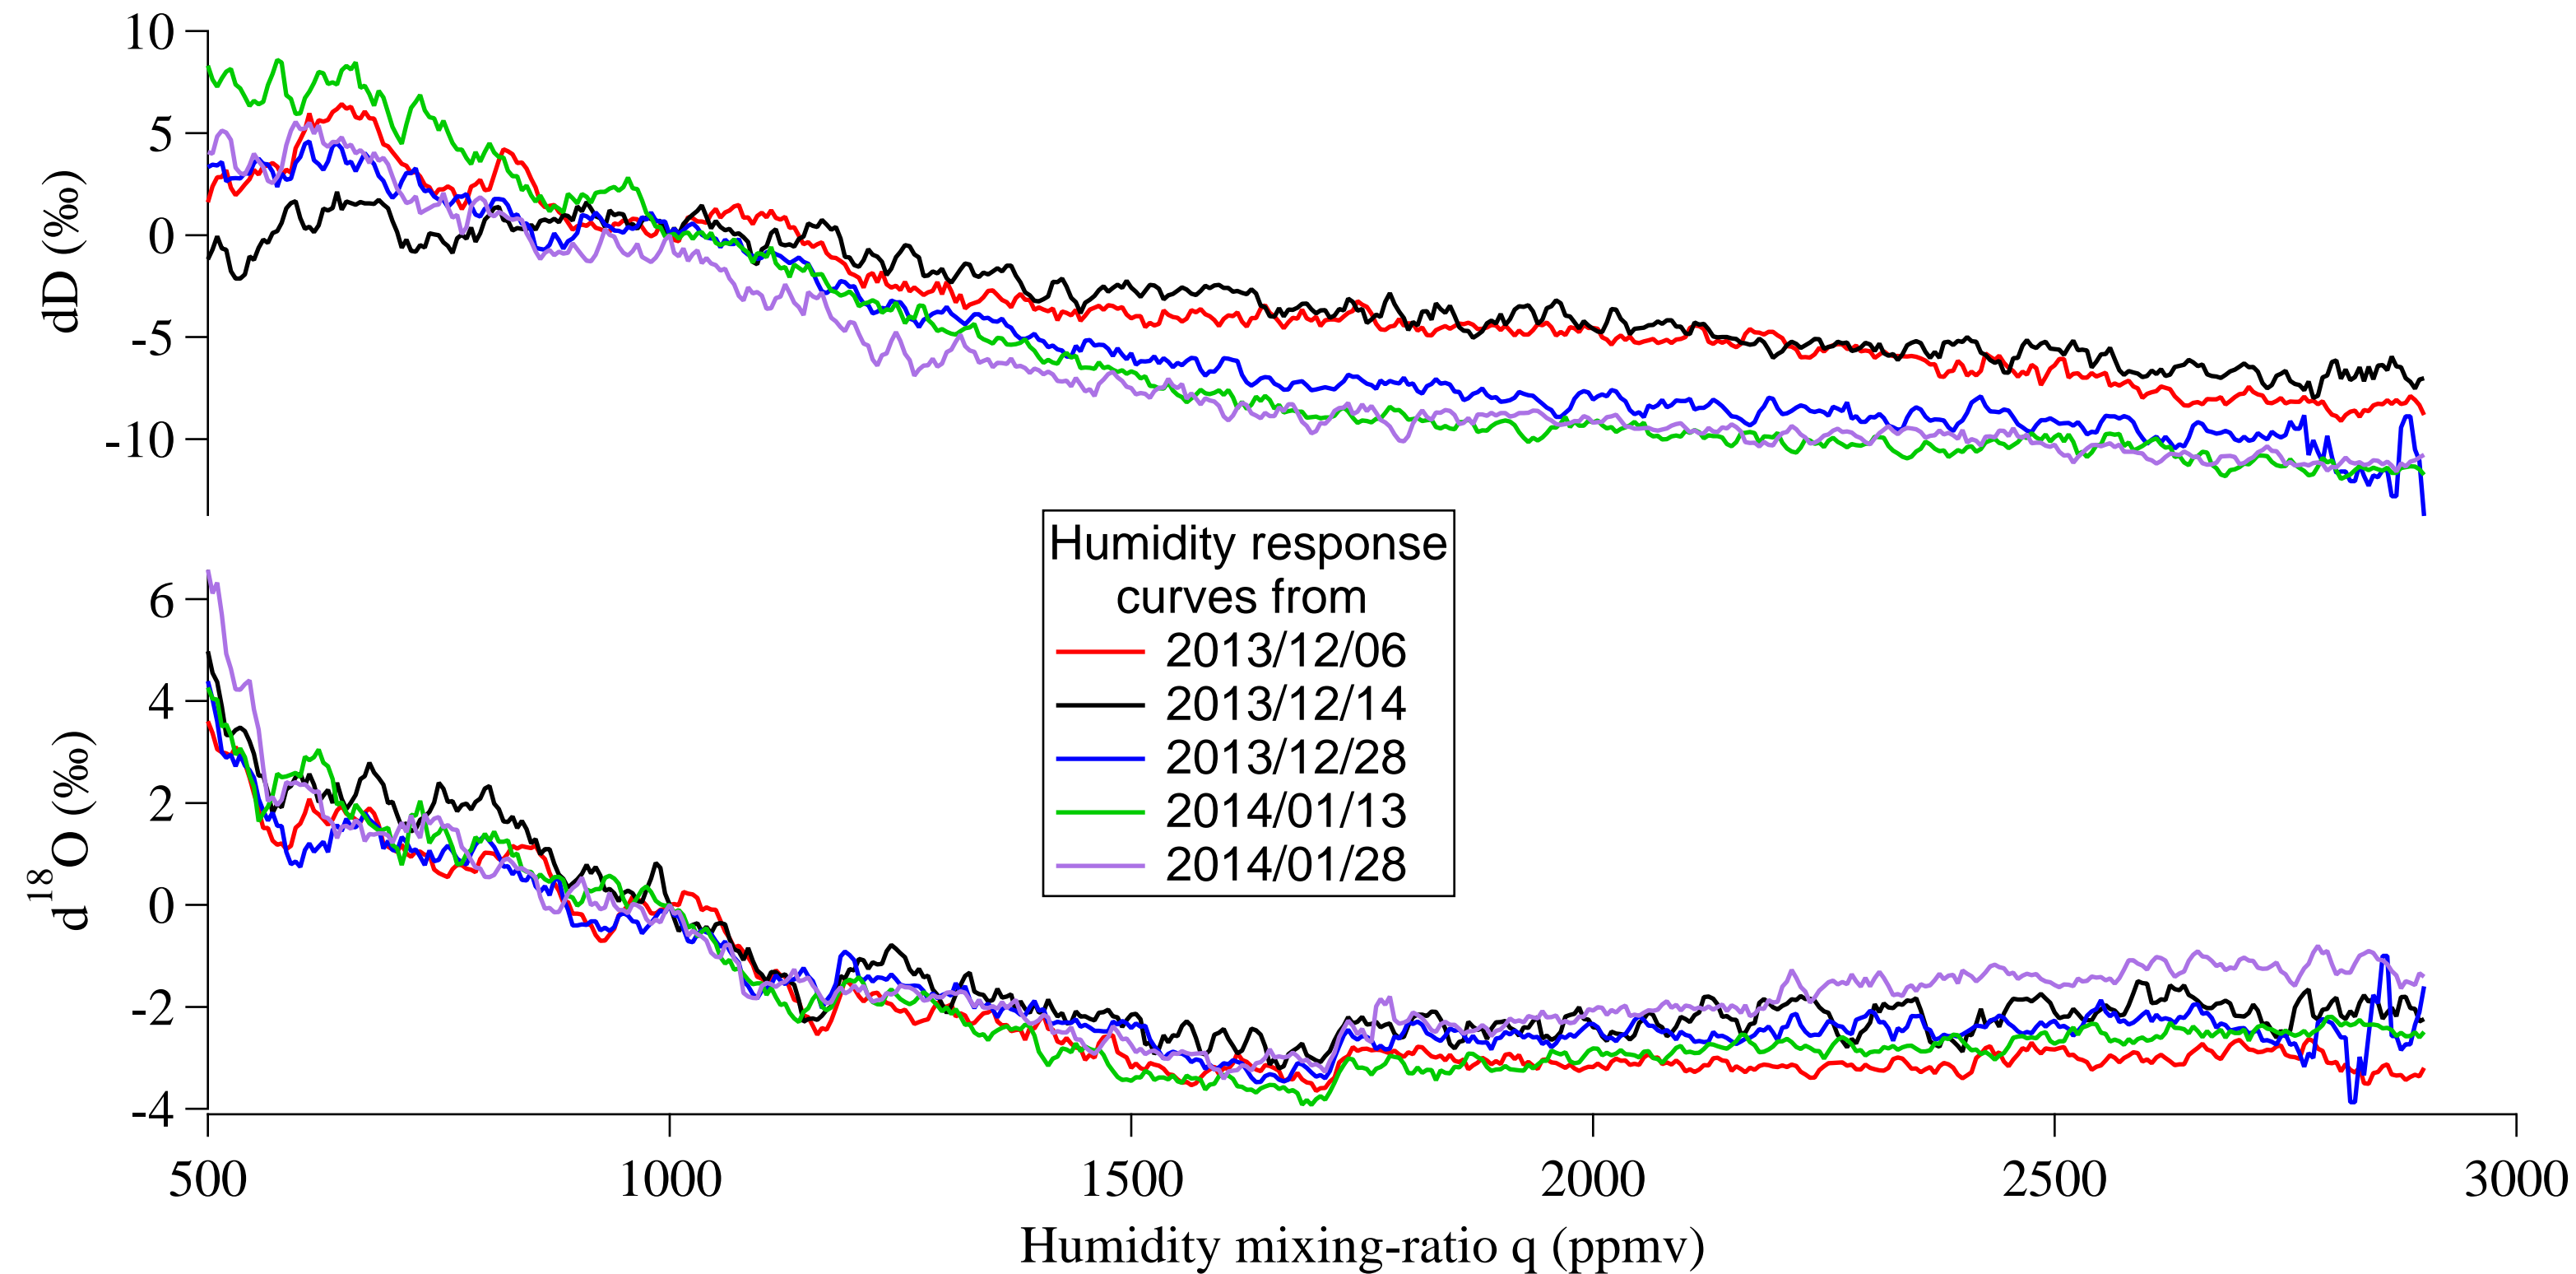

Supplement: Supplementary file 1 [file tc-10-1647-2016-supplement.zip]

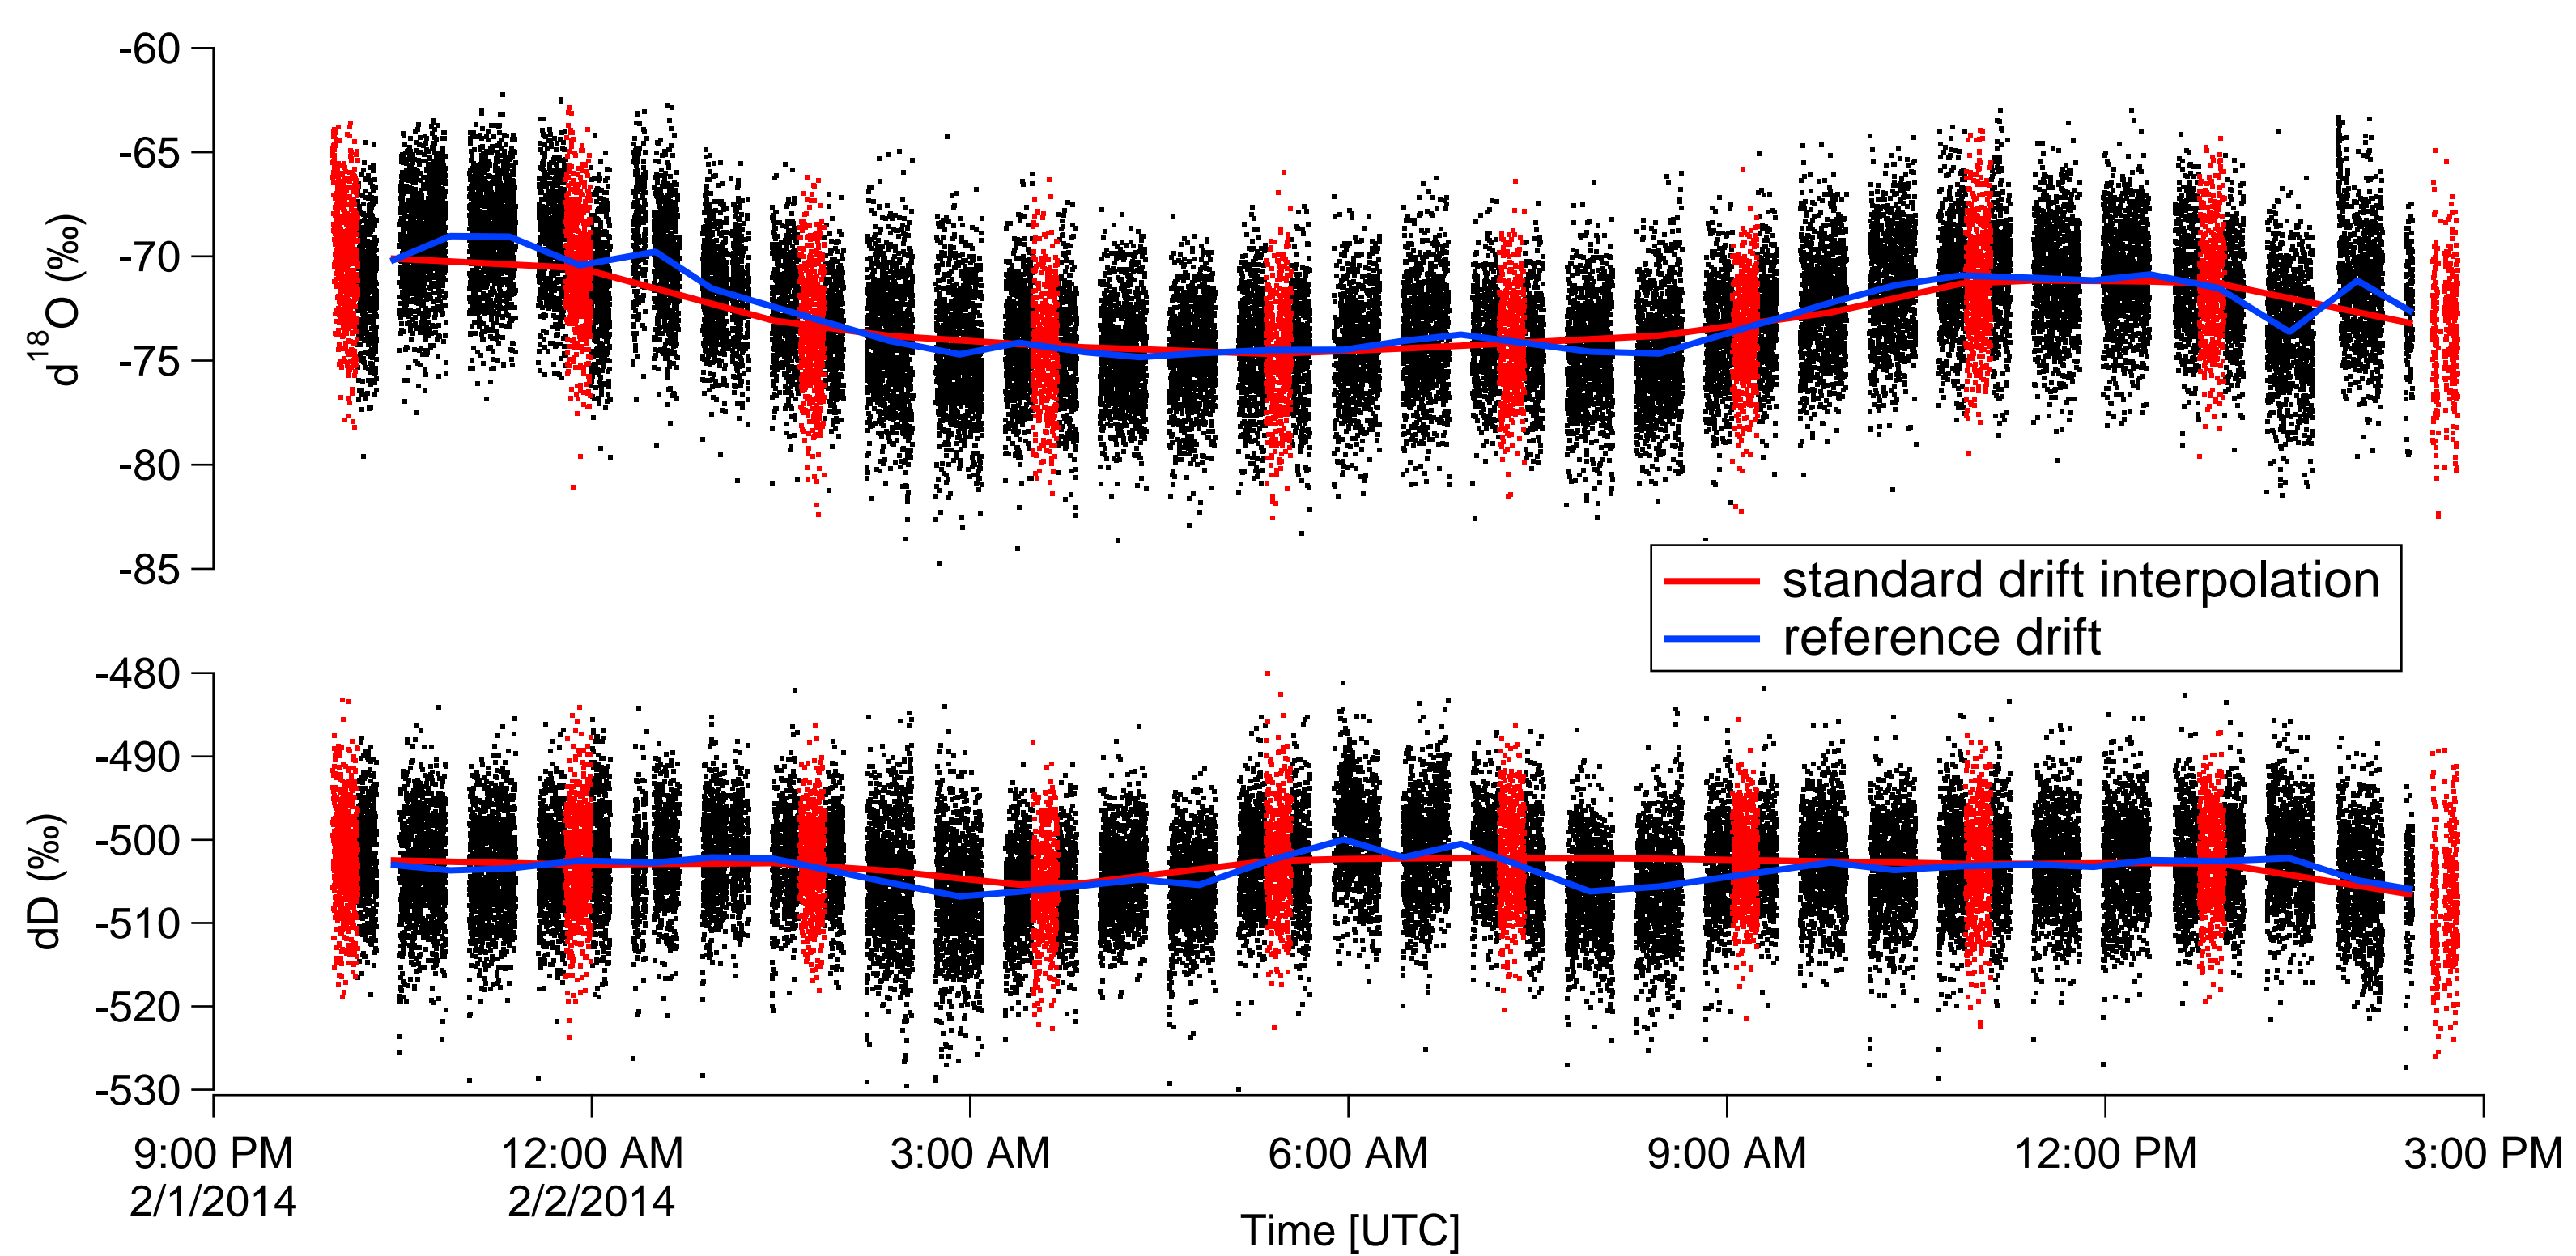

Supplement: Supplementary file 3 [file tc-10-1647-2016-supplement.zip]

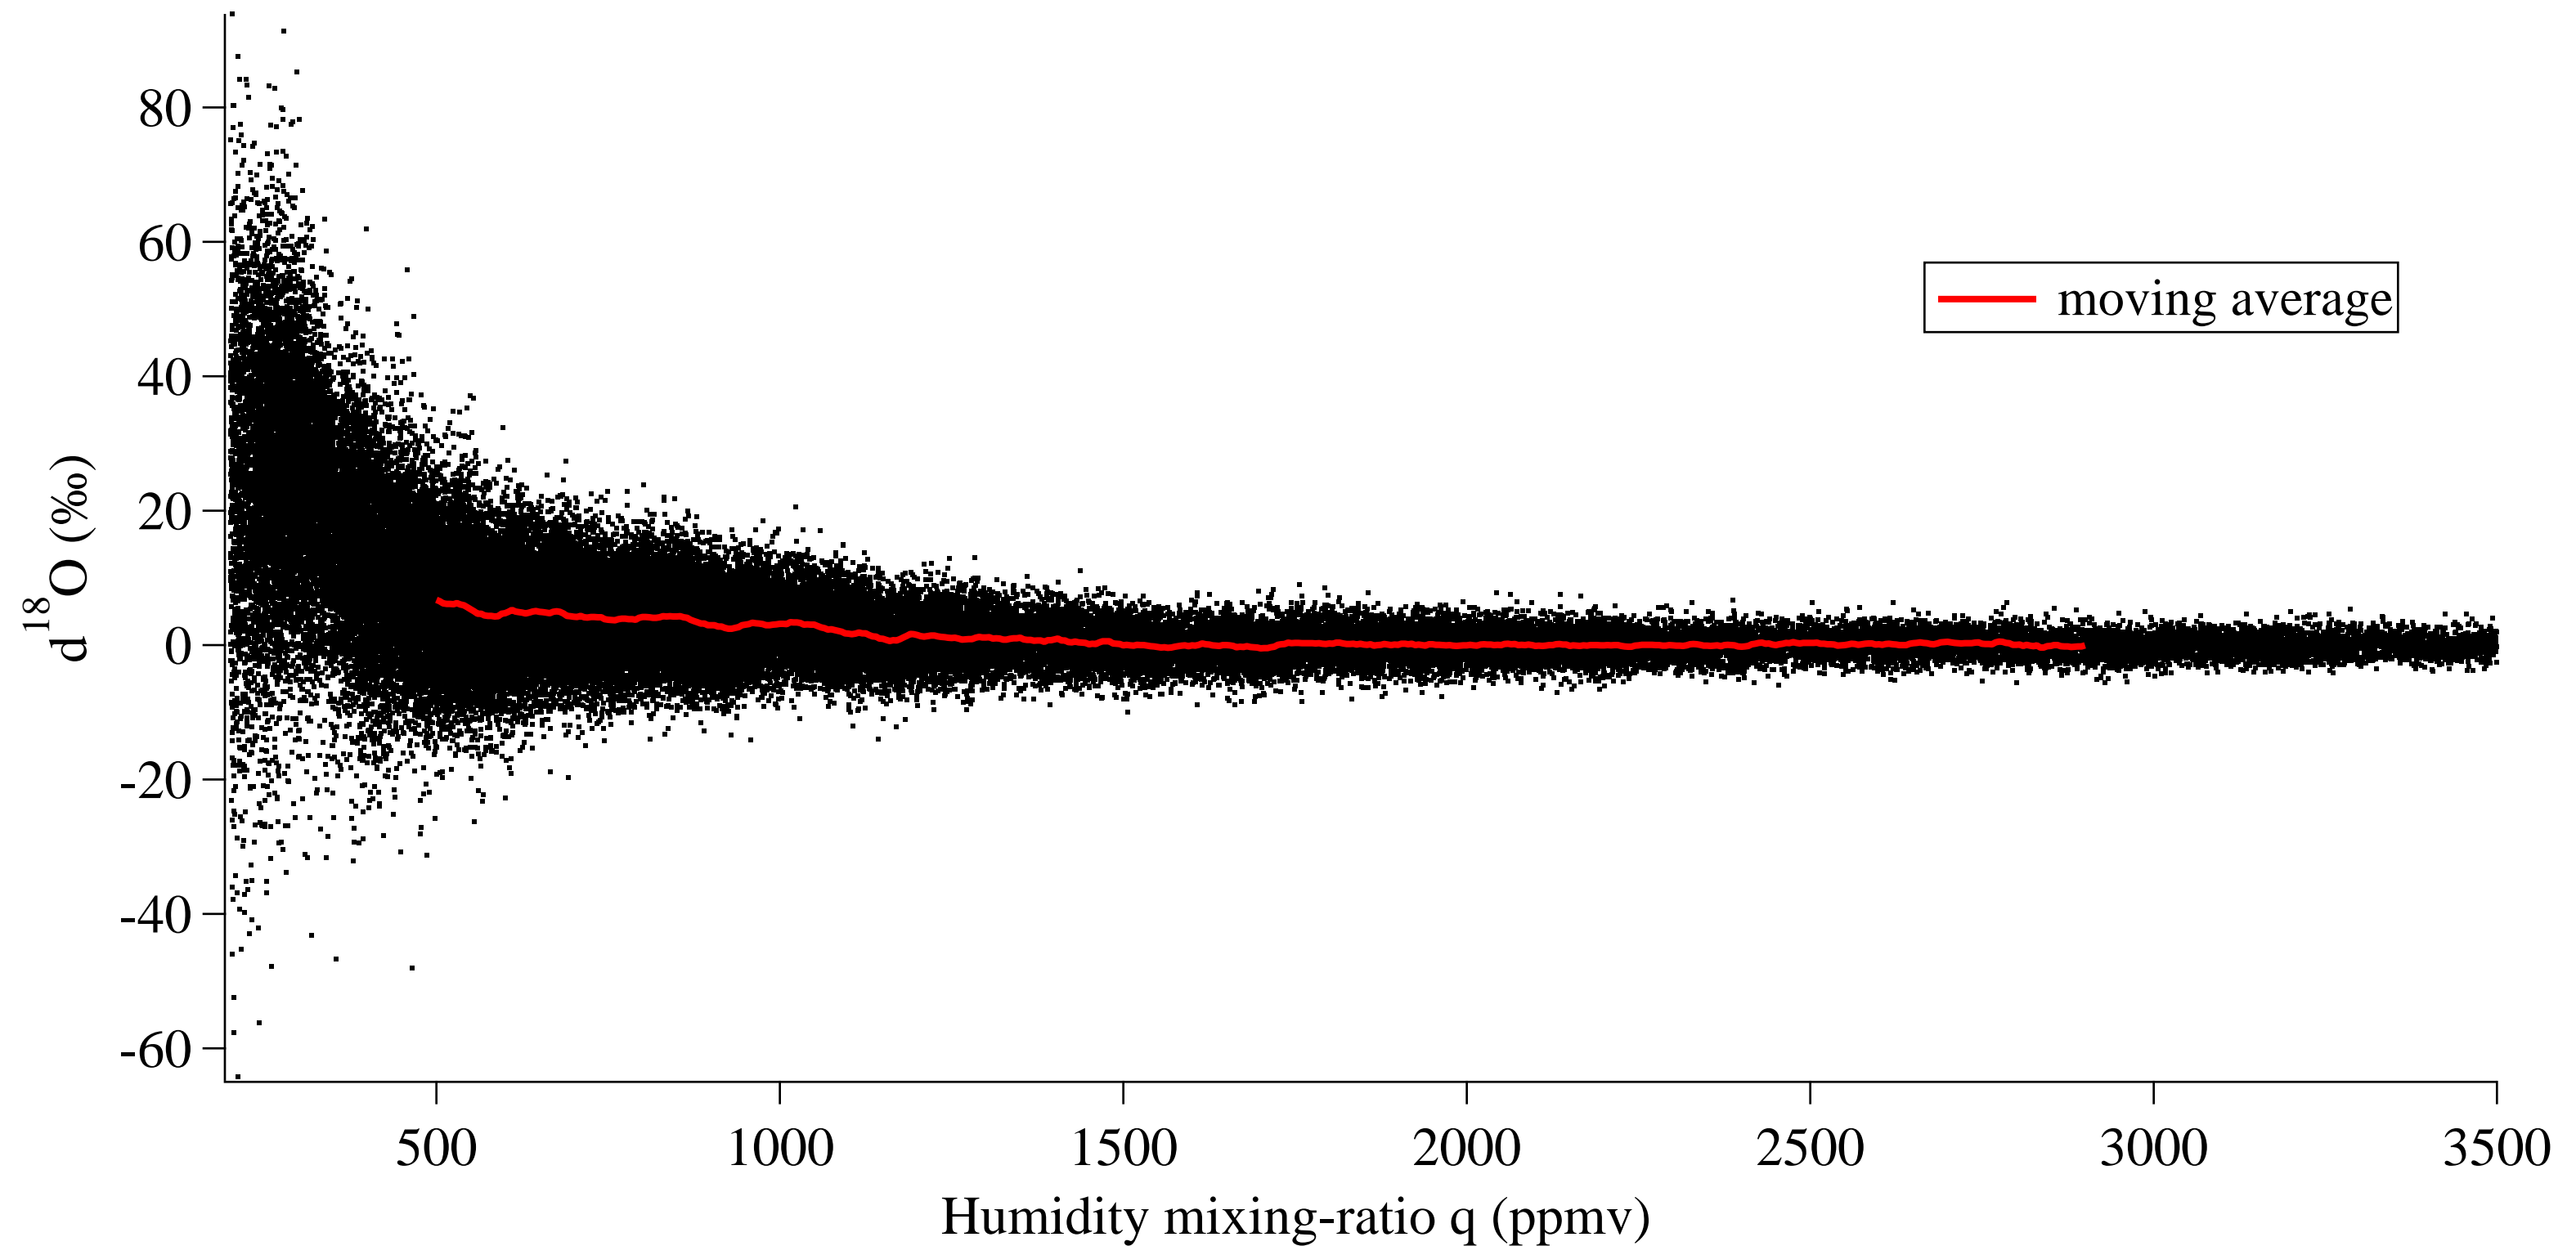

Supplement: Supplementary file 5 [file tc-10-1647-2016-supplement.zip]
